# Supplementary material for: 2D lanthanide coordination polymers constructed from a semi-rigid tricarboxylic acid ligand: crystal structure, luminescence sensing and color tuning
Source: Royal Society of Chemistry journal article supplement (doi:10.1039/d0ce00968g), 2020-01-01
Supplement: d0ce00968g1.pdf [file d0ce00968g1.pdf]

## 2D lanthanide coordination polymers constructed by a semi-rigidity tricarboxylic acid ligand: crystal structure, luminescence sensing and color tuning

Guang-Ming Liang<sup>a\*</sup>, Shuang Wang<sup>b,c</sup>, Mei-yu Xu<sup>a</sup>, Hai-Lin Chen<sup>b</sup>, Guang-Yuan Liang<sup>b</sup>, Liu-Cheng Gui<sup>b\*</sup> and Xiu-Jian Wang<sup>b</sup>

<sup>a</sup>Chemical Synthesis and Pollution Control Key Laboratory of Sichuan Province, College of Chemistry and Chemical Engineering, China West Normal University, Nanchong 637002, China.

<sup>b</sup>School of Chemistry and Pharmaceutical Sciences, Guangxi Normal University, Guilin 541004, China

<sup>c</sup>Jixian No.4 Middle School, Shuangyashan 155100, China

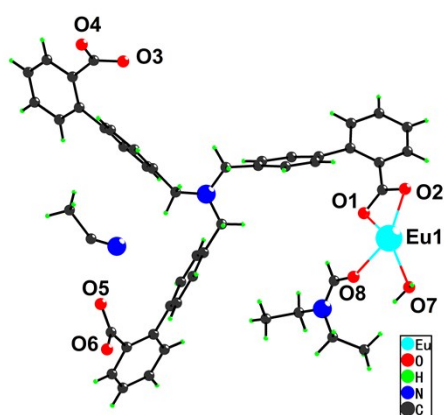

Figure. S1 Asymmetric unit of Complex 1

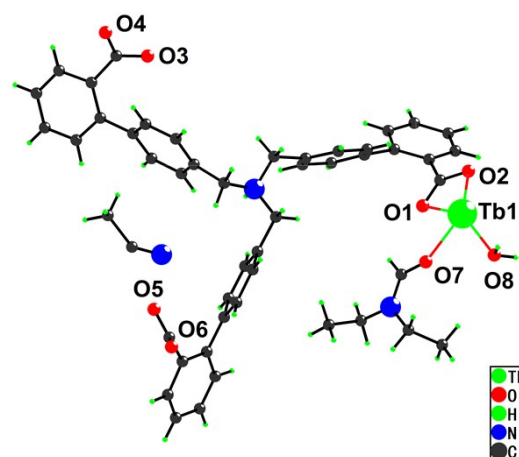

Figure. S2 Asymmetric unit of Complex 2

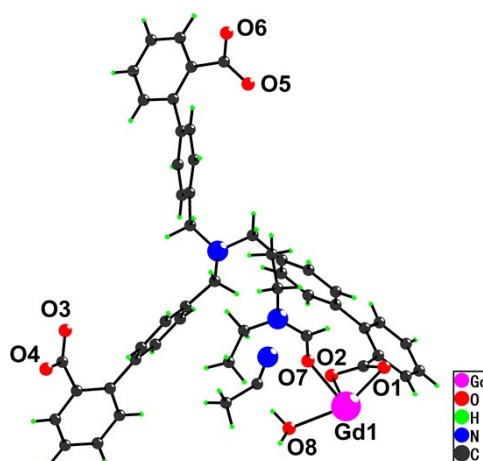

Figure. S3 Asymmetric unit of Complex 3

(a)

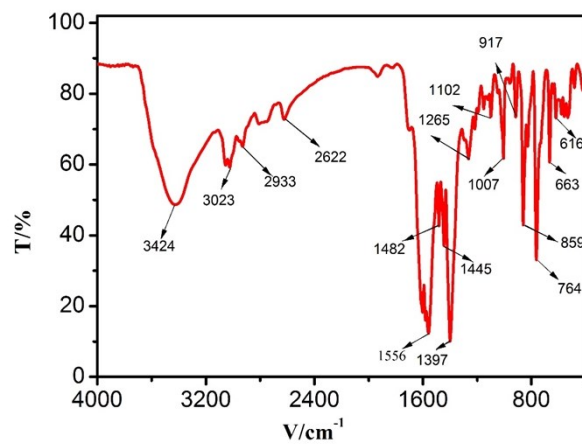

(b)

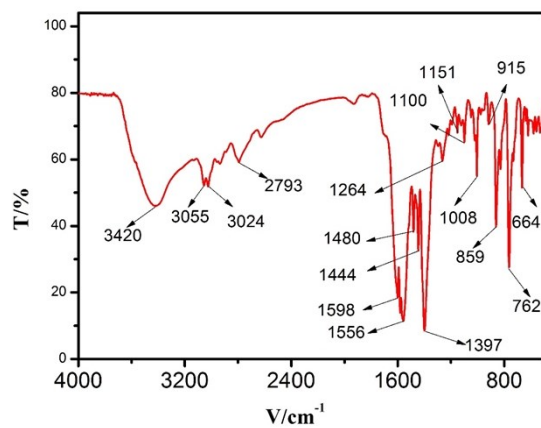

(c)

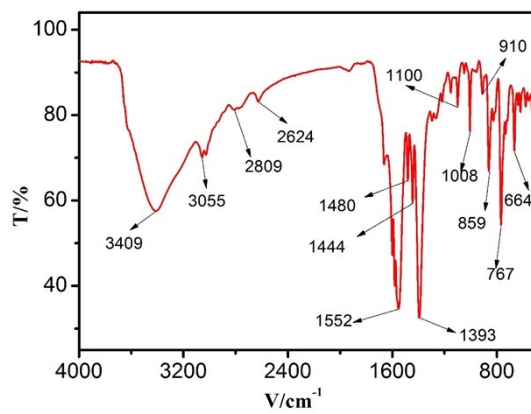

Figure. S4 The FT-IR spectra of complexes 1-3

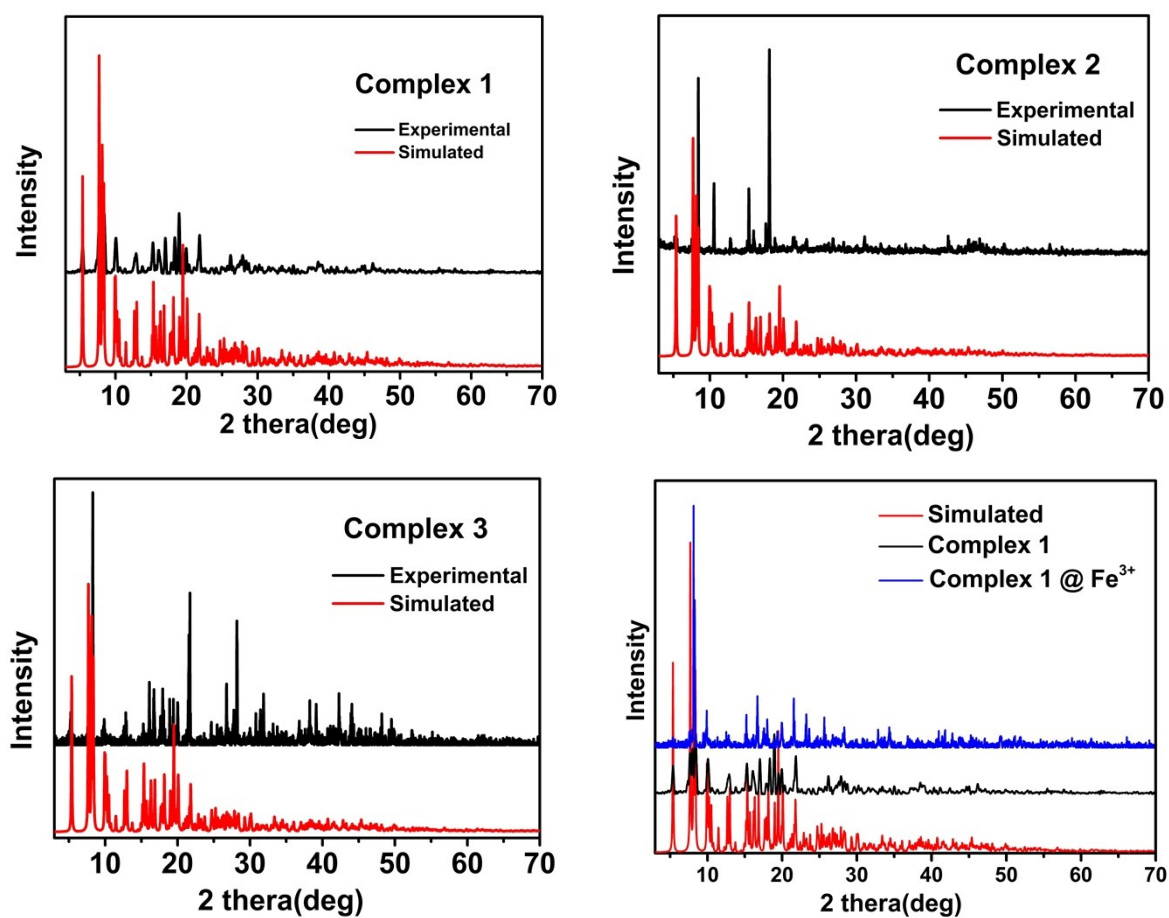

**Figure. S5** Simulated (bottom) and experimental (top) powder X-ray diffraction patterns of 1-3 and XRD pattern of the product obtained after dispersing complex 1 into Fe<sup>3+</sup> CH<sub>3</sub>OH solutions of  $1.0 \times 10^{-2} \text{ mol} \cdot \text{L}^{-1}$

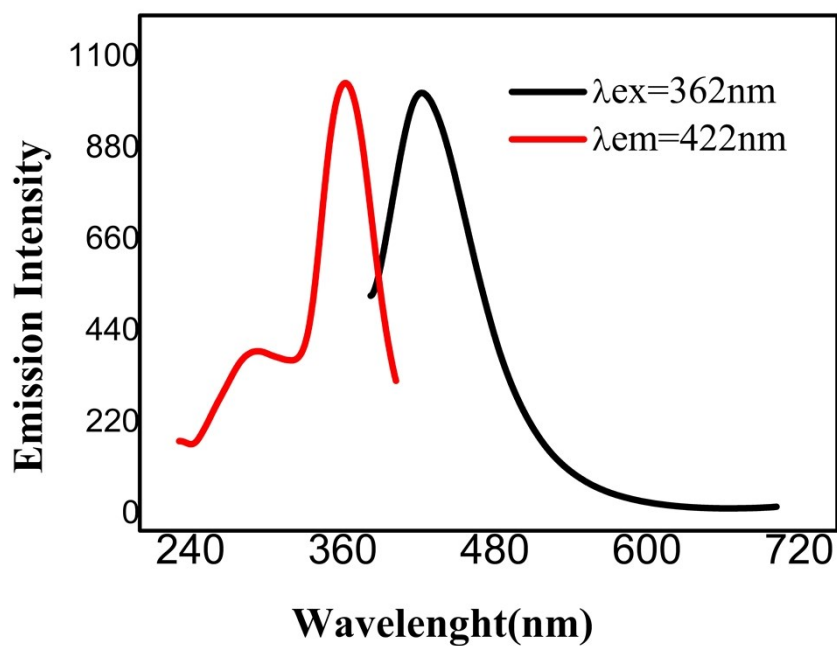

**Figure. S6** Solid-state emission spectra of free H<sub>3</sub>TMCA

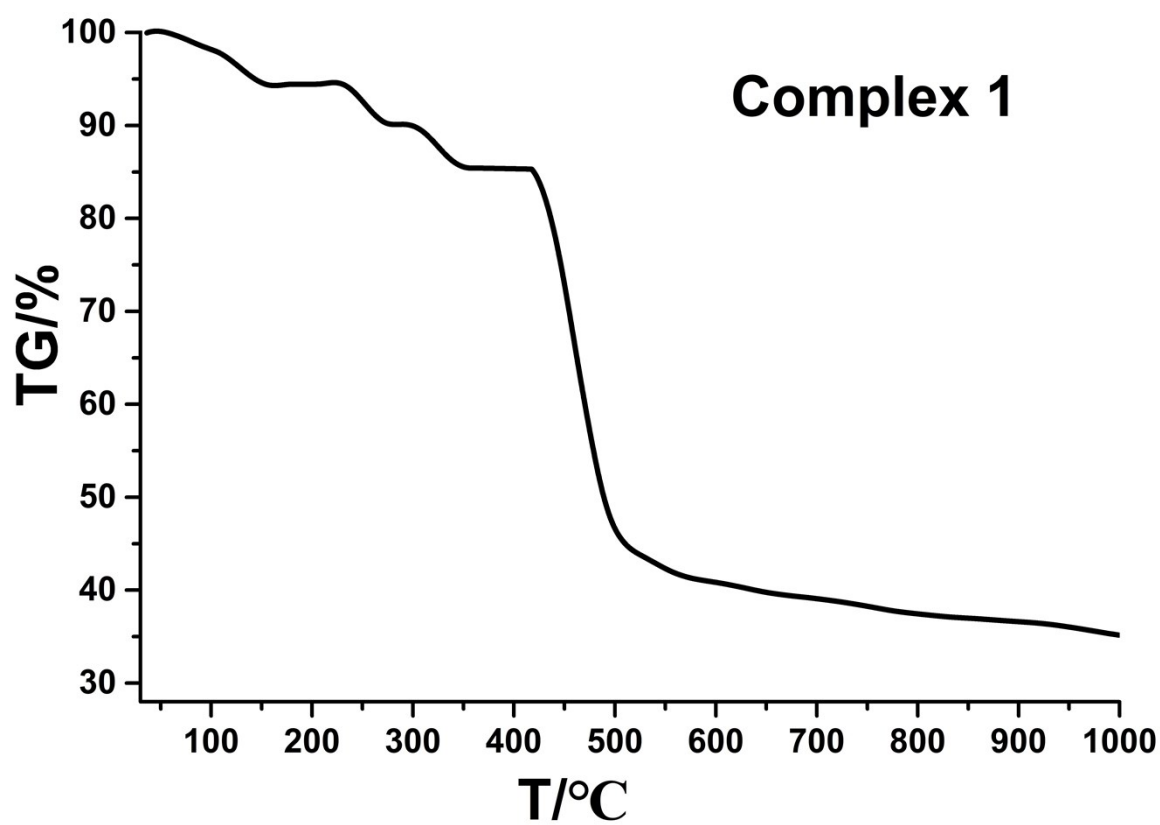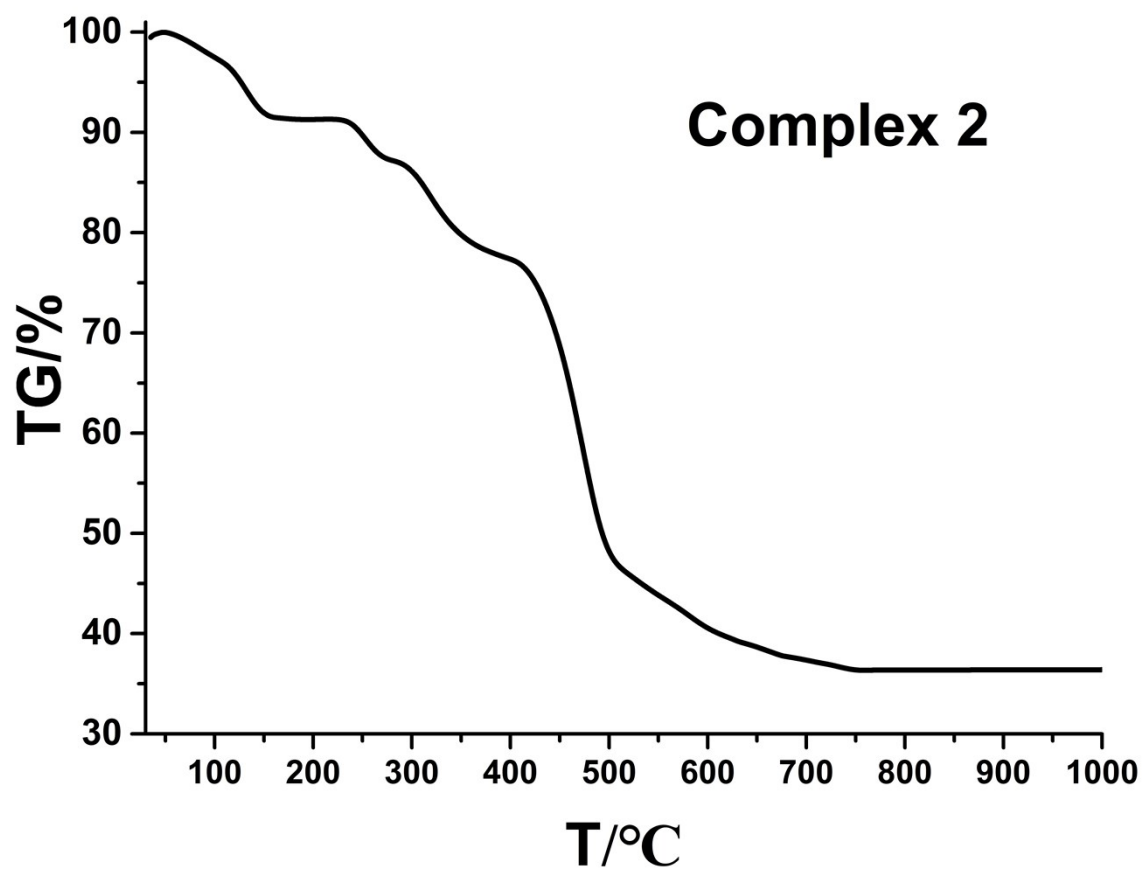

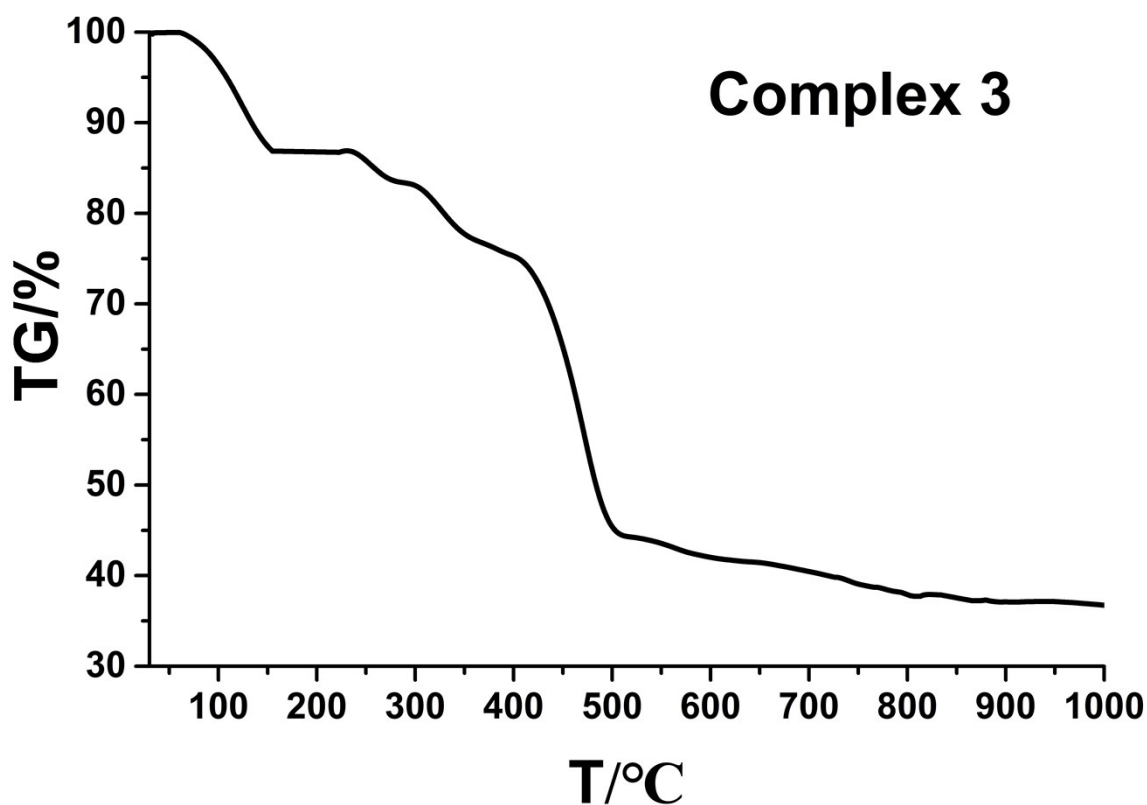

Figure. S7 TGA curves of complexes 1-3.

Table. S1 Selected Bond Lengths (Å) and Bond Angles (deg) for 1-3

| Complex 1             |           |                                         |            |
|-----------------------|-----------|-----------------------------------------|------------|
| Eu1—O1                | 2.528 (3) | O1—Eu1—O4 <sup>i</sup>                  | 124.68 (8) |
| Eu1—O2                | 2.463 (3) | O2—Eu1—O1                               | 52.32 (8)  |
| Eu1—O3 <sup>i</sup>   | 2.427 (2) | O2—Eu1—O4 <sup>i</sup>                  | 75.31 (8)  |
| Eu1—O4 <sup>i</sup>   | 2.760 (3) | O2—Eu1—O5 <sup>iii</sup>                | 133.43 (8) |
| Eu1—O4 <sup>ii</sup>  | 2.375 (2) | O3 <sup>i</sup> —Eu1—O1                 | 126.75 (9) |
| Eu1—O5 <sup>iii</sup> | 2.508 (3) | O3 <sup>i</sup> —Eu1—O2                 | 82.87 (9)  |
| Eu1—O6 <sup>iii</sup> | 2.425 (3) | O3 <sup>i</sup> —Eu1—O4 <sup>i</sup>    | 49.37 (7)  |
| Eu1—O7                | 2.426 (3) | O4 <sup>ii</sup> —Eu1—O6 <sup>iii</sup> | 156.51 (9) |
| Eu1—O8                | 2.348 (3) | O4 <sup>ii</sup> —Eu1—O1                | 82.62 (9)  |
| Complex 2             |           |                                         |            |
| Tb1—O1                | 2.507 (3) | O1—Tb1—O4 <sup>i</sup>                  | 124.71 (8) |
| Tb1—O2                | 2.427 (2) | O2—Tb1—O1                               | 52.95 (8)  |
| Tb1—O3 <sup>i</sup>   | 2.389 (2) | O2—Tb1—O4 <sup>i</sup>                  | 74.81 (8)  |
| Tb1—O4 <sup>ii</sup>  | 2.338 (3) | O2—Tb1—O5 <sup>iii</sup>                | 133.28 (8) |

|                       |           |                                        |             |
|-----------------------|-----------|----------------------------------------|-------------|
| Tb1—O4 <sup>i</sup>   | 2.802 (3) | O3 <sup>i</sup> —Tb1—O1                | 126.78 (8)  |
| Tb1—O5 <sup>iii</sup> | 2.484 (3) | O3 <sup>i</sup> —Tb1—O2                | 82.02 (9)   |
| Tb1—O6 <sup>iii</sup> | 2.398 (3) | O3 <sup>i</sup> —Tb1—O4 <sup>i</sup>   | 48.96 (8)   |
| Tb1—O7                | 2.318 (3) | O3 <sup>i</sup> —Tb1—O5 <sup>iii</sup> | 71.62 (9)   |
| Tb1—O8                | 2.395 (3) | O4 <sup>ii</sup> —Tb1—O1               | 82.52 (9)   |
| <b>Complex 3</b>      |           |                                        |             |
| Gd1—O1                | 2.415 (3) | O1—Gd1—O2                              | 53.27 (9)   |
| Gd1—O2                | 2.499 (3) | O1—Gd1—O3 <sup>i</sup>                 | 72.29 (9)   |
| Gd1—O3 <sup>i</sup>   | 2.419 (3) | O1—Gd1—O4 <sup>i</sup>                 | 119.15 (9)  |
| Gd1—O4 <sup>i</sup>   | 2.759 (3) | O1—Gd1—O5 <sup>iii</sup>               | 74.70 (9)   |
| Gd1—O4 <sup>ii</sup>  | 2.366 (3) | O1—Gd1—O6 <sup>iii</sup>               | 82.73 (9)   |
| Gd1—O8                | 2.410 (3) | O3 <sup>i</sup> —Cd1—O4 <sup>i</sup>   | 54.07 (9)   |
| Gd1—O7                | 2.333 (3) | O3 <sup>i</sup> —Gd1—O2                | 71.27 (9)   |
| Gd1—O5 <sup>iii</sup> | 2.524 (3) | O3 <sup>i</sup> —Gd1—O4 <sup>i</sup>   | 49.32 (8)   |
| Gd1—O6 <sup>iii</sup> | 2.448 (3) | O4 <sup>ii</sup> —Gd1—O1               | 156.35 (10) |

Symmetry transformations used to generate equivalent atoms in complex **(1)**: (i)  $-x+1, -y+4, -z$ ; (ii)  $x, y, z-1$ ; (iii)  $-x+1, -y+3, -z$ ; **(2)**(i)  $-x+1, -y+2, -z+2$ ; (ii)  $x, y, z-1$ ; (iii)  $-x+1, -y+1, -z+2$ ; **(3)**: (i)  $x, y-1, z$ ; (ii)  $-x+1, -y+1, -z+1$ ; (iii)  $-x+1, -y+1, -z$ ;

**Table. S2**

| MOF-based chemsensor                                                                        | Analyst          | Concentration<br>mg <sup>-1</sup> mL <sup>-1</sup> | LOD/ $\mu$ M | $K_{SV}10^4/M^{-1}$ | Ref.      |
|---------------------------------------------------------------------------------------------|------------------|----------------------------------------------------|--------------|---------------------|-----------|
| [Eu <sub>2</sub> (2,3'-oba) <sub>3</sub> (phen) <sub>2</sub> ] <sub>n</sub>                 | Fe <sup>3+</sup> | 0.66                                               | 7.93         | 1.37                | 1         |
| [Zn <sub>2</sub> (cptpy)(btc)(H <sub>2</sub> O)] <sub>n</sub>                               | Fe <sup>3+</sup> | 1.66                                               | 4.33         | 0.5456              | 2         |
| {[Zn <sub>3</sub> (HL) <sub>2</sub> H <sub>2</sub> O]·4H <sub>2</sub> O} <sub>n</sub>       | Fe <sup>3+</sup> | -                                                  | 220          | 50                  | 3         |
| {Zn <sub>2</sub> (NO <sub>3</sub> ) <sub>2</sub> (4,4'-bpy) <sub>2</sub> (TBA)}             | Fe <sup>3+</sup> | 1                                                  | 7.18         | 0.748               | 4         |
| [Cd <sub>2</sub> (btc)(bib)(HCOO)(H <sub>2</sub> O)·H <sub>2</sub> O] <sub>n</sub>          | Fe <sup>3+</sup> | -                                                  | 1.56         | 0.605               | 5         |
| {[Eu(L)(HCOO)]·H <sub>2</sub> O} <sub>n</sub>                                               | Fe <sup>3+</sup> | 1.5                                                | 1            | 0.7461              | 6         |
| [Pb <sub>1.5</sub> (DBPT)] <sub>2</sub> ·(DMA) <sub>3</sub> (H <sub>2</sub> O) <sub>4</sub> | Fe <sup>3+</sup> | 1                                                  | 2.5          | 12                  | 7         |
| {[Zn <sub>2</sub> (TRZ) <sub>2</sub> (DBTDC-O <sub>2</sub> )]·DMAc} <sub>n</sub>            | Fe <sup>3+</sup> | -                                                  | 4.61         | 1.0                 | 8         |
| [Eu(L <sub>1</sub> )(H <sub>2</sub> O)]·1.5H <sub>2</sub> O                                 | Fe <sup>3+</sup> | -                                                  | 0.87         | 6.607               | 9         |
| [Tb(TBOT)(H <sub>2</sub> O)](H <sub>2</sub> O) <sub>4</sub> (DMF)(NMP) <sub>0.5</sub>       | Fe <sup>3+</sup> | -                                                  | 130          | 0.551               | 10        |
| {[Eu(TMCA)(DEF)(H <sub>2</sub> O)]·(CH <sub>3</sub> CN)} <sub>n</sub>                       | Fe <sup>3+</sup> | 2                                                  | 31           | 0.184               | This Work |

## References

- [1] J.-M. Li, R. Li and X. Li, *CrystEngComm.*, 2018, **20**, 4962-4972.
- [2] H. Chen, P. Fan, X. Tu, H. Min, X. Yu, X. Li, J.-L. Zeng, S. Zhang and P. Cheng, *Chem. Asian J.*, 2019, **14**, 3611-3619.
- [3] W.-Q. Tong, W.-N. Liu, L.-L. Ma, Y. Wang, J.-M. Wang, L. Hou and Y.-Y. Wang, *Dalton Trans.*, 2019, **48**, 7786-7793.
- [4] X. Zhang, X. Zhuang, N. Zhang, C. Ge, X. Luo, J. Li, J. Wu, Q. Yang and R. Liu, *CrystEngComm.*, 2019, **21**, 1948-1955.
- [5] J. Wang, J. Wu, L. Lu, H. Xu, M. Trivedi, A. Kumar, J. Liu and M. Zheng, *Front. Chem.*, 2019, **7**, 244.
- [6] Y. Liu, J. Ma, C. Xu, Y. Yang, M. Xia, H. Jiang and W. Liu, *Dalton Trans.*, 2018, **47**, 13543-13549.
- [7] Y. Sun, B.-X. Dong and W.-L. Liu, *Spectrochim. Acta A.*, 2019, **223**, 117283.
- [8] H. He, Q.-Q. Zhu, C.-P. Li and M. Du, *Cryst. Growth Des.*, 2019, **19**, 694-703.
- [9] Y. Tao, P. Zhang, J. Liu, X. Chen, X. Guo, H. Jin, J. Chai, L. Wang and Y. Fan, *New J. Chem.*, 2018, **42**, 19485-19493.
- [10] M. Chen, W.-M. Xu, J.-Y. Tian, H. Cui, J.-X. Zhang, C.-S. Liu and M. Du, *J. Mater. Chem. C.*, 2017, **5**, 2015-2021.
